# Supplementary material
Source: publisher figshare collection journal article supplement (https://acs.figshare.com/ndownloader/files/3860680)
Supplement: Supplementary file 1 [file 3860680]

## Supporting Information

### An Activatable Two-Photon Fluorescence Nanoprobe for Bioimaging of Glutathione in Living Cells and Tissues

Hong-Min Meng<sup>†</sup>, Zhen Jin<sup>‡</sup>, Yifan Lv<sup>†</sup>, Chan Yang<sup>†</sup>, Xiao-Bing Zhang<sup>\*†</sup>, Weihong Tan<sup>†</sup> and Ru-Qin Yu<sup>†</sup>

*<sup>†</sup>Molecular Sciences and Biomedicine Laboratory, State Key Laboratory for Chemo/Biosensing and Chemometrics, College of Chemistry and Chemical Engineering, College of Biology, Collaborative Innovation Center for Chemistry and Molecular Medicine, Hunan University, Changsha 410082, China*

*<sup>‡</sup>College of Veterinary Medicine, South China Agricultural University, Guangzhou 510642, China*

\* To whom correspondence should be addressed.

xbzhang@hnu.edu.cn

#### Table of contents

|           |     |
|-----------|-----|
| Scheme S1 | S-2 |
| Figure S1 | S-2 |
| Figure S2 | S-3 |
| Figure S3 | S-3 |
| Figure S4 | S-4 |
| Figure S5 | S-4 |
| Figure S6 | S-5 |
| Figure S7 | S-5 |
| Figure S8 | S-6 |
| Figure S9 | S-7 |

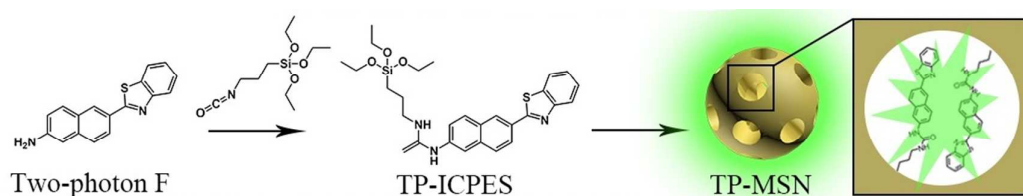

**Scheme S1.** Synthesis of TP-ICPES and TP-MSN.

Scheme S1 showed that two-photon MSNs were first synthesized by a base-catalyzed sol-gel procedure using a two-photon fluorophore-conjugated organic silane monomer.

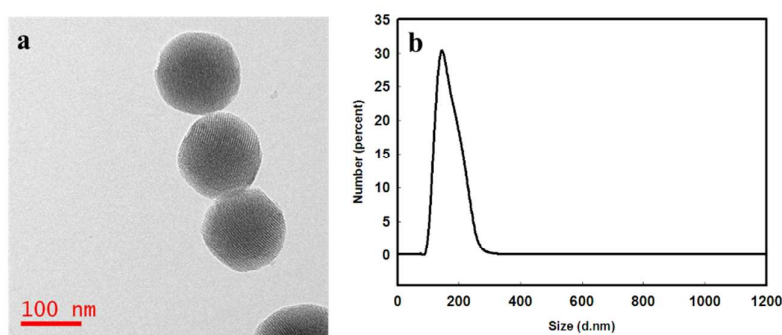

**Figure S1.** (a) TEM image of two-photon MSN; (b) DLS data of two-photon MSN.

As seen from Figure S1, the two-photon MSN has good monodispersity and that the size (diameter) was measured at about 140 nm.

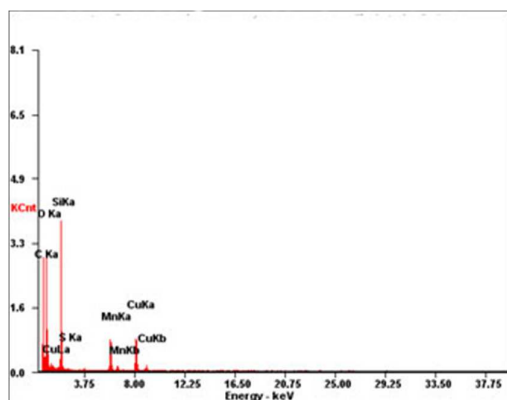

**Figure S2.** Energy dispersive spectroscopy analysis of TP-MSNs@MnO<sub>2</sub>.

As seen from Figure S2, the presence of amino groups on the surface of the two-photon MSNs, negatively charged MnO<sub>2</sub> nanosheets can be easily adsorbed onto positively charged MSNs through electrostatic interaction.

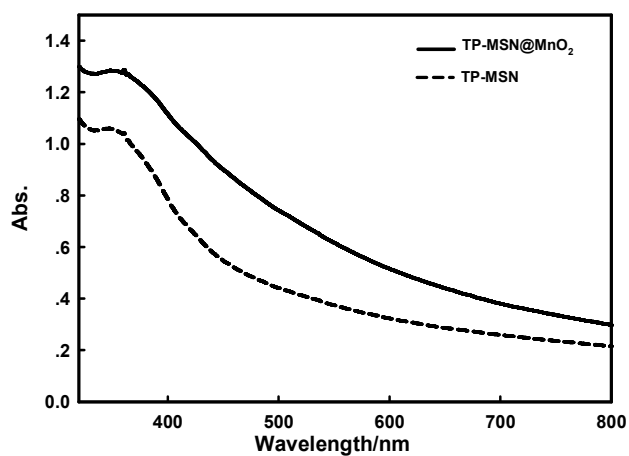

**Figure S3.** The UV-vis absorption spectrum of TP-MSN and TP-MSN@MnO<sub>2</sub>.

As seen from Figure S3, the UV-vis absorption spectra of TP-MSN@MnO<sub>2</sub> nanocomposite indicate the formation of the MnO<sub>2</sub> adsorbed onto the TP-MSNs with corresponding peaks at 380 nm.

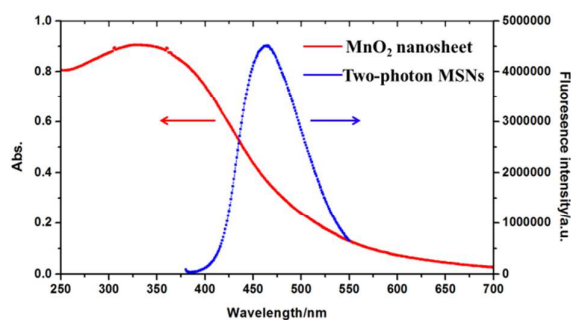

**Figure S4.** Spectral overlap showing the fluorescence emission spectrum of the two-photon MSNs (blue) and the UV-vis absorption spectrum of MnO<sub>2</sub> nanosheet (red).

As shown in Figure S4, the absorbance spectrum of MnO<sub>2</sub> nanosheet overlaps well with the fluorescence emission of the TP-MSNs, thereby leading to ET from the TP-MSNs to the MnO<sub>2</sub>.

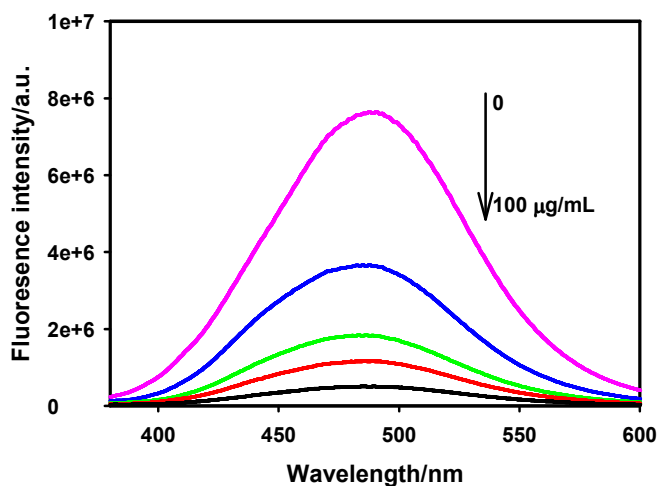

**Figure S5.** Fluorescence quenching of TP-MSN ( $100 \mu\text{g mL}^{-1}$ ) by varying amounts of MnO<sub>2</sub> nanosheets.

It is clear from Figure S5 that the fluorescence quenching degree was dependent on the concentration of MnO<sub>2</sub> nanosheet and a maximum quenching degree up to 98.1% was achieved with 100  $\mu\text{g/mL}$  quencher.

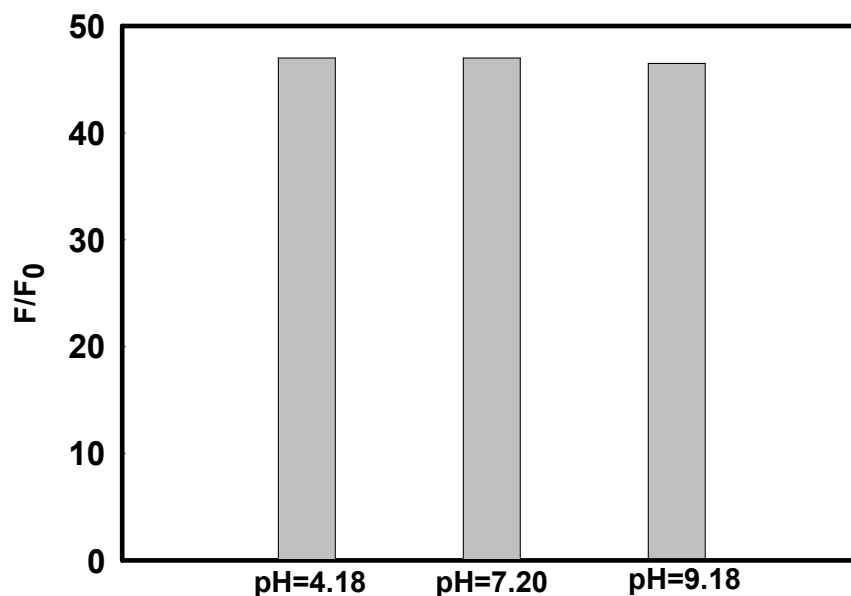

**Figure S6.** Effect of pH on the one-photon excited fluorescence intensity of TP-MSN@MnO<sub>2</sub> nanocomposite in the presence of GSH (1 mM).

This result indicates that there is no effect of pH on the fluorescent response of the probe.

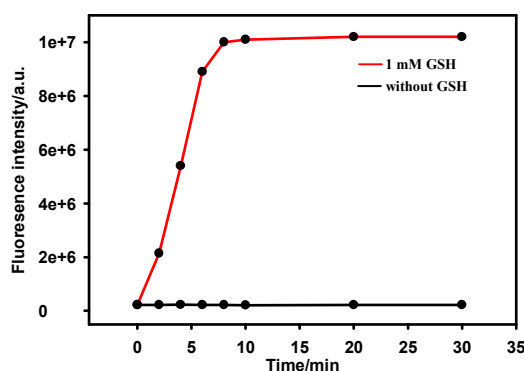

**Figure S7.** Fluorescence response of TP-MSN@MnO<sub>2</sub> nanocomposite in the absence of GSH (black) and in the presence of GSH (1 mM) (red), as a function of time.

As seen from Figure S7, the fluorescence intensity of TP-MSNs gradually increased with the elongation of time and reached equilibrium after a few minutes, revealing a rapid decomposition of the nanoscale MnO<sub>2</sub> by GSH at room temperature. Because of the GSH-mediated reduction of MnO<sub>2</sub>, the FRET process is inhibited.

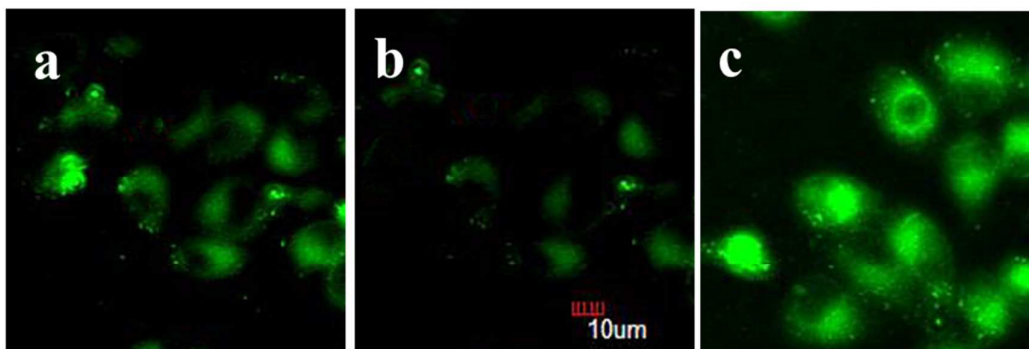

**Figure S8.** TP confocal microscopy images of GSH detection in live HeLa cells. (a) TP image of cells incubated with the TP-MSN@MnO<sub>2</sub> nanocomposite; (b) TP image of HeLa cells pretreated with LPA for 24 h and then NMM (500 μM) for 30 min, followed by incubation with the TP-MSN@MnO<sub>2</sub> nanocomposite; (c) TP image of HeLa cells pretreated with LPA (500 μM) for 24 h, followed by incubation with the TP-MSN@MnO<sub>2</sub> nanocomposite.

This result indicates that this TP-MSN@MnO<sub>2</sub> nanocomposite can be rapidly delivered into the cytoplasm and a high level of GSH is expressed in HeLa cells.

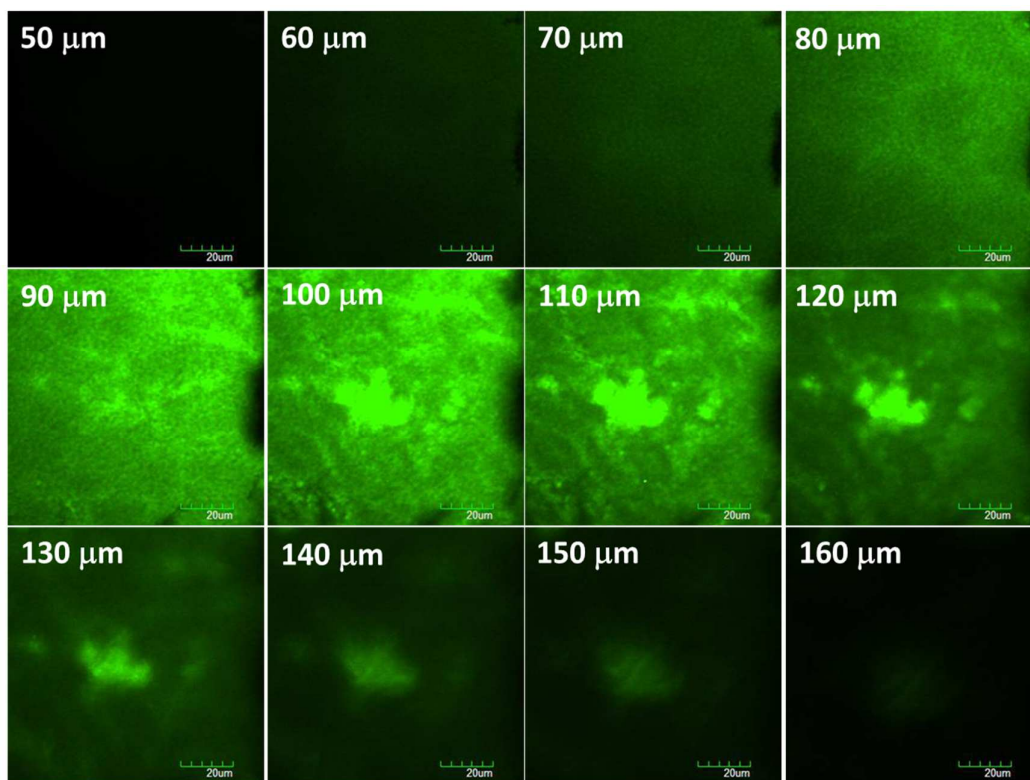

**Figure S9.** Depth fluorescence images of TP-MSNs in tissues were obtained with spectral confocal multiphoton microscopy (Olympus, FV1000) with a high-performance mode-locked titanium-sapphire laser source (MaiTai, Spectra-Physics, USA). Next, the changes of fluorescence intensity with scan depth were determined by spectral confocal multiphoton microscopy (Olympus, FV1000) in the z-scan mode (from 0 to 400  $\mu\text{m}$ ; step size: 1  $\mu\text{m}$ ). The images were collected at 450-530 nm (green channel). Scale bars: 30  $\mu\text{m}$ .

The results clearly demonstrate that TP-MSNs@MnO<sub>2</sub> has increased light penetration depth in tissue.
